# Supplementary material for: Sarc-F and muscle function in community dwelling adults with aged care service needs: baseline and post-training relationship
Source: PubMed Central journal article supplement (PMC6884990; doi:10.7717/peerj.8140), 2019-11-27
Supplement: peerj-07-8140-s001.pdf [file peerj-07-8140-s001.pdf]

Supplementary Figure 1: MUAD Progressive Resistance and Balance training protocol and programme.

|                                        | Conditioning phase                            |                                                   | Training                             |
|----------------------------------------|-----------------------------------------------|---------------------------------------------------|--------------------------------------|
|                                        | Wk 1 & 2                                      | Wk 3 & 4                                          | Wk 5 - 24                            |
| <b>Progressive Resistance training</b> |                                               |                                                   |                                      |
| 1. Chest press                         |                                               |                                                   |                                      |
| 2. Seated row                          |                                               |                                                   |                                      |
| 3. Leg press                           | 2 sets,                                       | 3 sets,                                           | 3 sets,                              |
| 4. Leg curl                            | 8 repetitions @                               | 8 repetitions @                                   | 8-12 repetitions <sup>2</sup>        |
| 5. Leg extension                       | 50% predicted                                 | 60% predicted                                     | @ 75% predicted                      |
| 6. Leg adduction                       | 1RM <sup>1</sup>                              | 1RM                                               | 1RM                                  |
| 7. Leg adduction                       |                                               |                                                   |                                      |
| 8. Abdominal crunch                    |                                               |                                                   |                                      |
| <b>Balance exercises</b>               |                                               |                                                   |                                      |
| 1. Single leg stand                    |                                               |                                                   | 2 sets @ 20 s/leg<br>2 sets,         |
| 2. Tight rope walking                  | Increase stable<br>surface/object<br>support. | Reduced support.<br>Increased<br>repetitions/time | 10 steps forward<br>& 10 back        |
| 3. Box stepping                        | Reduces sets and<br>repetitions/time.         |                                                   | 5 X clockwise & 5<br>X anticlockwise |
| 4. Calf raises                         |                                               |                                                   | 2 sets,<br>10 repetitions            |

Notes:

- <sup>1.</sup> The predicted 1 repetition maximum (1RM) was a conservatively assumed based on the participant's individual exercise ability and has been safely and effectively employed in similar populations (Henwood et al. 2008; Hewitt et al. 2014).
- <sup>2.</sup> Exercise resistance was increased when participants were able to perform 12 repetitions for all 3 sets using the appropriate technique (Henwood et al. 2008).
